# Supplementary material for: β-Glucan content and in vitro bile-acid binding capacity of Agaricus bisporus and Pleurotus spp.
Source: Royal Society of Chemistry journal article supplement (doi:10.1039/d4fo02416h), 2024-01-01
Supplement: d4fo02416h1.pdf [file d4fo02416h1.pdf]

Supplementary Table 1. Contents of total glucans,  $\alpha$ -glucans and  $\beta$ -glucans (g/100 g dry weight) in raw and cooked mushrooms

| Samples                           | Cooking methods | Total glucans                | $\alpha$ -glucans           | $\beta$ -glucans            |
|-----------------------------------|-----------------|------------------------------|-----------------------------|-----------------------------|
| Oats                              | Raw             | 7.6 $\pm$ 0.1                | n.a.                        | 7.6 $\pm$ 0.1 <sup>b</sup>  |
|                                   | Cooked          | 4.9 $\pm$ 0.1                | n.a.                        | 4.9 $\pm$ 0.1 <sup>a</sup>  |
| <i>Pleurotus</i> , Shimeji        | Raw             | 34.4 $\pm$ 0.6 <sup>b</sup>  | 1.9 $\pm$ 0.0 <sup>b</sup>  | 32.5 $\pm$ 0.6              |
|                                   | Boiling         | 33.5 $\pm$ 0.2 <sup>ab</sup> | 2.0 $\pm$ 0.0 <sup>b</sup>  | 31.5 $\pm$ 0.2              |
|                                   | Frying          | 31.8 $\pm$ 0.6 <sup>a</sup>  | 1.4 $\pm$ 0.0 <sup>a</sup>  | 30.4 $\pm$ 0.6              |
| <i>Pleurotus</i> , Oyster         | Raw             | 42.3 $\pm$ 1.3 <sup>a</sup>  | 5.0 $\pm$ 0.3 <sup>c</sup>  | 37.4 $\pm$ 1.3 <sup>a</sup> |
|                                   | Boiling         | 50.1 $\pm$ 0.8 <sup>b</sup>  | 3.2 $\pm$ 0.1 <sup>b</sup>  | 46.9 $\pm$ 0.8 <sup>b</sup> |
|                                   | Frying          | 42.5 $\pm$ 1.1 <sup>a</sup>  | 2.8 $\pm$ 0.0 <sup>a</sup>  | 39.7 $\pm$ 1.1 <sup>a</sup> |
| <i>Agaricus bisporus</i> , Button | Raw             | 10.3 $\pm$ 0.0 <sup>a</sup>  | 2.2 $\pm$ 0.0               | 8.1 $\pm$ 0.0 <sup>a</sup>  |
|                                   | Boiling         | 15.5 $\pm$ 0.3 <sup>b</sup>  | 2.2 $\pm$ 0.1               | 13.3 $\pm$ 0.3 <sup>b</sup> |
|                                   | Frying          | 10.1 $\pm$ 0.7 <sup>ab</sup> | 2.4 $\pm$ 0.2               | 7.7 $\pm$ 0.7 <sup>a</sup>  |
| <i>Agaricus bisporus</i> , Cup    | Raw             | 7.4 $\pm$ 0.4                | 1.1 $\pm$ 0.0 <sup>a</sup>  | 6.4 $\pm$ 0.4               |
|                                   | Boiling         | 9.6 $\pm$ 0.1                | 1.5 $\pm$ 0.0 <sup>b</sup>  | 8.1 $\pm$ 0.1               |
|                                   | Frying          | 8.8 $\pm$ 0.2                | 1.9 $\pm$ 0.0 <sup>c</sup>  | 7.0 $\pm$ 0.2               |
| <i>Agaricus bisporus</i> , Flat   | Raw             | 5.5 $\pm$ 0.1 <sup>a</sup>   | 1.0 $\pm$ 0.0 <sup>ab</sup> | 4.5 $\pm$ 0.1 <sup>a</sup>  |
|                                   | Boiling         | 8.3 $\pm$ 1.1 <sup>b</sup>   | 1.1 $\pm$ 0.0 <sup>b</sup>  | 7.2 $\pm$ 1.1 <sup>b</sup>  |
|                                   | Frying          | 5.3 $\pm$ 0.0 <sup>a</sup>   | 0.7 $\pm$ 0.0 <sup>a</sup>  | 4.6 $\pm$ 0.0 <sup>a</sup>  |
| <i>Agaricus bisporus</i> , Brown  | Raw             | 9.1 $\pm$ 0.7 <sup>a</sup>   | 1.5 $\pm$ 0.1 <sup>a</sup>  | 7.6 $\pm$ 0.7 <sup>a</sup>  |
|                                   | Boiling         | 13.8 $\pm$ 0.8 <sup>ab</sup> | 2.4 $\pm$ 0.1 <sup>b</sup>  | 11.4 $\pm$ 0.8 <sup>b</sup> |
|                                   | Frying          | 8.9 $\pm$ 0.3 <sup>a</sup>   | 1.6 $\pm$ 0.0 <sup>a</sup>  | 7.2 $\pm$ 0.3 <sup>a</sup>  |

Values are mean  $\pm$  SEM, n=2. For each mushroom type, a different letter denotes significant difference between cooking methods (P<0.05) as determined by a two-way ANOVA and a Tukey's post-hoc test. For oats, a different letter denotes significant difference between cooking methods (P<0.0001) as determined by a two-tailed student t-test. n.a., not analysed.
